# Supplementary material for: Unravelling the mechanism of phase fraction modulation via process parameter tuning and first-principles study for enhanced TCR in VO x -based uncooled microbolometers
Source: Royal Society of Chemistry journal article supplement (doi:10.1039/d5tc03508b), 2026-01-01
Supplement: d5tc03508b1.pdf [file d5tc03508b1.pdf]

## Supporting Information

### Unravelling the Mechanism of Phase Fraction Modulation via Process Parameter Tuning and First-Principles Study for Enhanced TCR in VO<sub>x</sub>-Based Uncooled Microbolometers

Sooraj Kumar<sup>1</sup>, Gagan Kumar Sharma<sup>2</sup>, Ujjwal Chitnis<sup>1</sup>, Shalini Singh<sup>3</sup>, Jay Krishna Anand<sup>1</sup>, Poojalakshmi Vageeswaran<sup>1</sup>, Rajesh Kumar Sharma<sup>1,4</sup>, Shankar Dutta<sup>4</sup>, Santanu Das<sup>5</sup>, Dibyajyoti Ghosh<sup>1,6</sup>, Davinder Kaur<sup>2</sup>, Ankur Goswami<sup>1,3\*</sup>

<sup>1</sup>Department of Materials Science and Engineering, Indian Institute of Technology, Delhi, Hauz Khas, New Delhi 110016, India

<sup>2</sup>Functional Nanomaterials Research Laboratory (FNRL), Department of Physics and Centre for Nanotechnology, Indian Institute of Technology Roorkee, Roorkee-247667, Uttarakhand, India

<sup>3</sup>School of Interdisciplinary Research, Indian Institute of Technology Delhi, Hauz Khas, New Delhi-110016, India

<sup>4</sup>Solid State Physics Laboratory, DRDO, Lucknow Road, Timarpur, Delhi, 110054, India

<sup>5</sup>Indian Institute of Technology BHU, Varanasi, 221005, Uttar Pradesh, India

<sup>6</sup>Department of Chemistry, Indian Institute of Technology, Delhi, Hauz Khas, New Delhi 110016, India

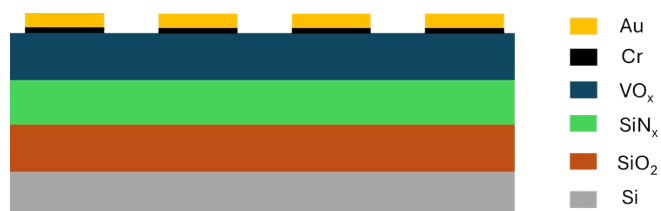

Figure S1: The architecture of VO<sub>x</sub> films deposited on Si/SiO<sub>2</sub>/SiN<sub>x</sub> substrate.

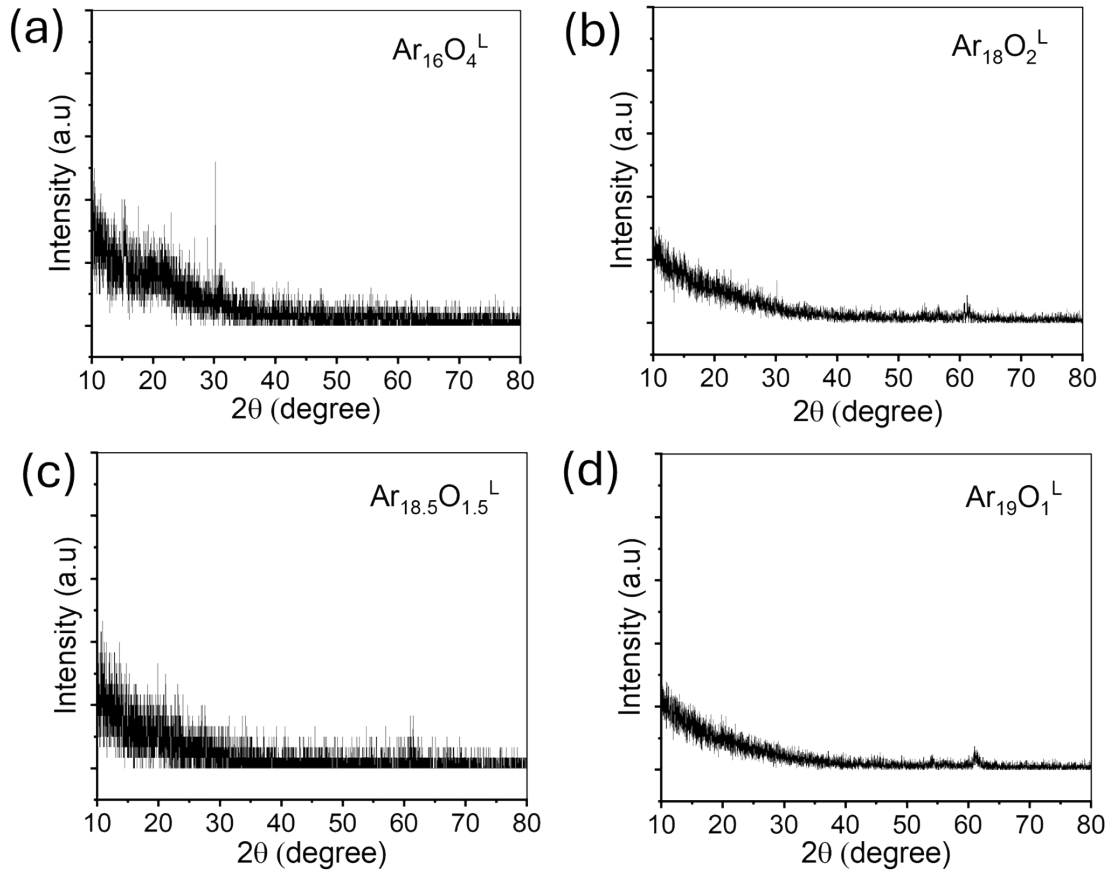

Figure S2: XRD pattern of films deposited at 250 °C

Table S1: Crystallite size of samples deposited at high temperature.

| Sample no | Sample Name                                 | Crystallite Size (nm) |
|-----------|---------------------------------------------|-----------------------|
| 1         | $\text{Ar}_{19}\text{O}_1^{\text{H}}$       | 15.4                  |
| 2         | $\text{Ar}_{18.5}\text{O}_{1.5}^{\text{H}}$ | 17.1                  |
| 3         | $\text{Ar}_{18}\text{O}_2^{\text{H}}$       | 20.3                  |
| 4         | $\text{Ar}_{16}\text{O}_4^{\text{H}}$       | 34.9                  |

Note: Although, we would like to mention that the compositional analysis through XPS is not an accurate technique as most of the surface of  $\text{VO}_x$  is highly oxidised to  $\text{V}_2\text{O}_5$  due to ambient atmosphere exposure (Begara et al. Applied Surface Science, 2017). Also, to remove this oxide we can etch the surface but that changes the oxidation state as reported by Silversmit et al. Surface Science, Vol. 600, 2006. Thus, XPS is more suitable to understand the presence of a particular oxidation state, but compositional analysis through XPS might not give very accurate results and can only give a rough estimate.

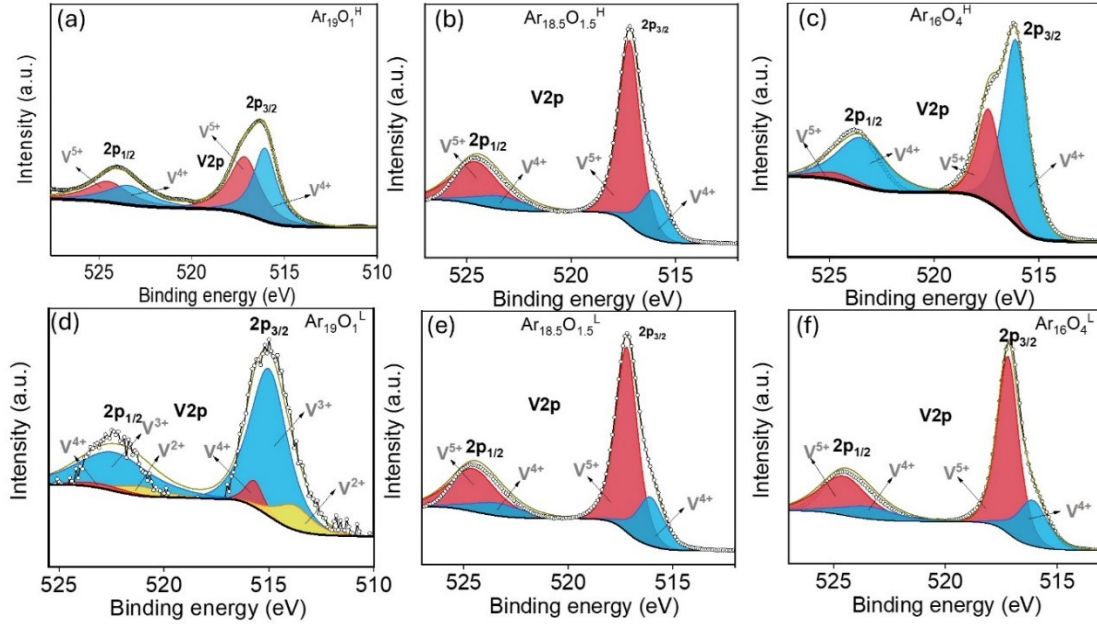

Figure S3: XPS spectra of samples (a)  $Ar_{19}O_1^H$  and (b)  $Ar_{18.5}O_{1.5}^H$  (c)  $Ar_{16}O_4^H$  and (d)  $Ar_{19}O_1^L$  (e)  $Ar_{18.5}O_{1.5}^L$  and (f)  $Ar_{16}O_4^L$

Table S2: Composition of films analysed from XPS data.

| S. No. | Sample name          | V <sup>2+</sup> (%) | V <sup>3+</sup> (%) | V <sup>4+</sup> (%) | V <sup>5+</sup> (%) | VO <sub>x</sub><br>composition |
|--------|----------------------|---------------------|---------------------|---------------------|---------------------|--------------------------------|
| 1      | $Ar_{19}O_1^H$       | 0                   | 0                   | 74                  | 26                  | VO <sub>2.13</sub>             |
| 2      | $Ar_{18.5}O_{1.5}^H$ | 0                   | 0                   | 35.9                | 64.1                | VO <sub>2.32</sub>             |
| 3      | $Ar_{18}O_2^H$       | 0                   | 0                   | 26.8                | 73.2                | VO <sub>2.37</sub>             |
| 4      | $Ar_{16}O_4^H$       | 0                   | 0                   | 24.7                | 75.3                | VO <sub>2.38</sub>             |
| 5      | $Ar_{19}O_1^L$       | 13                  | 80.2                | 6.8                 | 0                   | VO <sub>1.47</sub>             |
| 6      | $Ar_{18.5}O_{1.5}^L$ | 0                   | 0                   | 51.7                | 48.3                | VO <sub>2.24</sub>             |
| 7      | $Ar_{18}O_2^L$       | 0                   | 0                   | 49.5                | 50.5                | VO <sub>2.25</sub>             |
| 8      | $Ar_{16}O_4^L$       | 0                   | 0                   | 47.1                | 52.9                | VO <sub>2.26</sub>             |

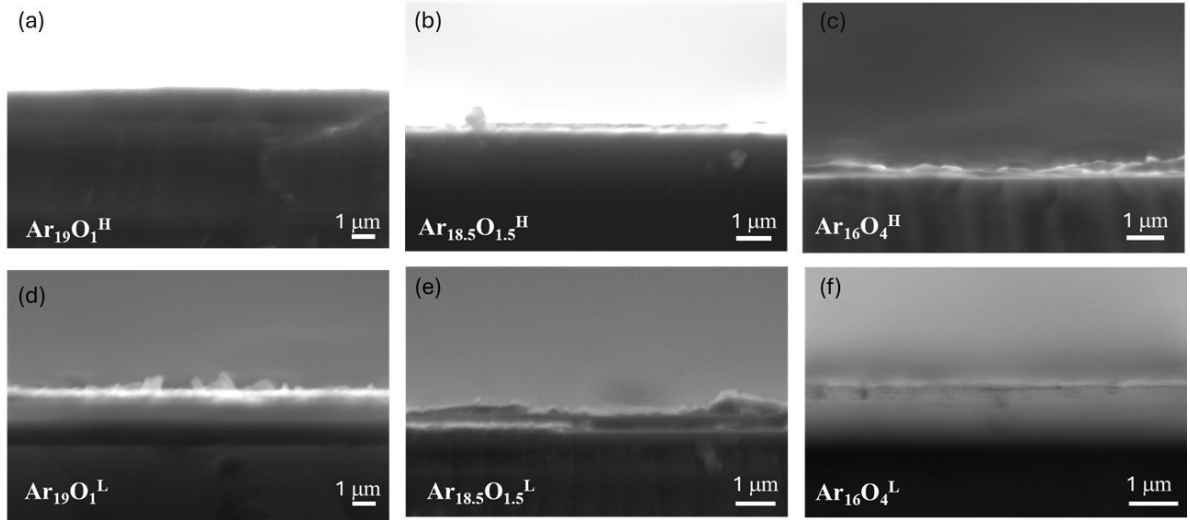

Figure S4: Cross sectional SEM micrograph of (a)  $\text{Ar}_{19}\text{O}_1^{\text{H}}$  (b)  $\text{Ar}_{18.5}\text{O}_{1.5}^{\text{H}}$  (c)  $\text{Ar}_{16}\text{O}_4^{\text{H}}$  and (d)  $\text{Ar}_{19}\text{O}_1^{\text{L}}$  (e)  $\text{Ar}_{18.5}\text{O}_{1.5}^{\text{L}}$  and (f)  $\text{Ar}_{16}\text{O}_4^{\text{L}}$ .

Table S3: Thickness of all samples deposited at 550 °C and 250 °C.

| Sample                                      | Thickness (nm)<br><i>Error (<math>\pm 5</math> nm)</i> |
|---------------------------------------------|--------------------------------------------------------|
| $\text{Ar}_{19}\text{O}_1^{\text{H}}$       | 330                                                    |
| $\text{Ar}_{18.5}\text{O}_{1.5}^{\text{H}}$ | 285                                                    |
| $\text{Ar}_{18}\text{O}_2^{\text{H}}$       | 250                                                    |
| $\text{Ar}_{16}\text{O}_4^{\text{H}}$       | 240                                                    |
| $\text{Ar}_{19}\text{O}_1^{\text{L}}$       | 190                                                    |
| $\text{Ar}_{18.5}\text{O}_{1.5}^{\text{L}}$ | 173                                                    |
| $\text{Ar}_{18}\text{O}_2^{\text{L}}$       | 150                                                    |
| $\text{Ar}_{16}\text{O}_4^{\text{L}}$       | 158                                                    |

| Sample                                           | Weight % |      | Atomic % |      |
|--------------------------------------------------|----------|------|----------|------|
|                                                  | V        | O    | V        | O    |
| Ar <sub>19</sub> O <sub>1</sub> <sup>H</sup>     | 45.8     | 54.2 | 21       | 79   |
| Ar <sub>18.5</sub> O <sub>1.5</sub> <sup>H</sup> | 43.6     | 56.4 | 19.5     | 80.5 |
| Ar <sub>18</sub> O <sub>2</sub> <sup>H</sup>     | 41.8     | 58.2 | 18.1     | 81.9 |
| Ar <sub>16</sub> O <sub>4</sub> <sup>H</sup>     | 33.8     | 66.2 | 13.8     | 86.2 |
| Ar <sub>19</sub> O <sub>1</sub> <sup>L</sup>     | 25.7     | 74.3 | 9.8      | 90.2 |
| Ar <sub>18.5</sub> O <sub>1.5</sub> <sup>L</sup> | 24.2     | 75.8 | 9.1      | 90.9 |
| Ar <sub>18</sub> O <sub>2</sub> <sup>L</sup>     | 23       | 77   | 9.3      | 90.7 |
| Ar <sub>16</sub> O <sub>4</sub> <sup>L</sup>     | 20.5     | 79.5 | 7.5      | 92.5 |

Table S4: EDX analysis of samples.

Table S5: TCR and sheet resistivity of films

| Sample                                           | Sheet Resistivity ( $\Omega/\text{sq}$ ) |
|--------------------------------------------------|------------------------------------------|
| Ar <sub>19</sub> O <sub>1</sub> <sup>H</sup>     | 6.7                                      |
| Ar <sub>18.5</sub> O <sub>1.5</sub> <sup>H</sup> | 4.5                                      |
| Ar <sub>18</sub> O <sub>2</sub> <sup>H</sup>     | 1.1                                      |
| Ar <sub>16</sub> O <sub>4</sub> <sup>H</sup>     | 9.5                                      |
| Ar <sub>19</sub> O <sub>1</sub> <sup>L</sup>     | 90.6                                     |
| Ar <sub>18.5</sub> O <sub>1.5</sub> <sup>L</sup> | 81.5                                     |
| Ar <sub>18</sub> O <sub>2</sub> <sup>L</sup>     | 31.7                                     |
| Ar <sub>16</sub> O <sub>4</sub> <sup>L</sup>     | 55.3                                     |
